# Supplementary material
Source: MDPI journal article supplement (https://www.mdpi.com/1999-4907/14/8/1665)
Supplement: s1 [file s1]

**Table S1 Stand characteristics (mean±SD) in the *Pinus massoniana*—*Lithocarpus glaber* coniferous and evergreen broadleaved mixed forest (PLF) and *L. glaber*—*Quercus glauca* evergreen broadleaved forest (LGF). DBH represents tree diameter at breast height, H represents tree height.**

| Forest type | Plot number | Stand density (tree ha <sup>-1</sup> ) | Average DBH (cm) | Average H (m) | Basal area (cm <sup>2</sup> ) | Dominant tree species                                                                                               |
|-------------|-------------|----------------------------------------|------------------|---------------|-------------------------------|---------------------------------------------------------------------------------------------------------------------|
| PLF         | 4           | 2550±772                               | 13.35±4.35       | 10.45±2.20    | 4085.80±701.36                | <i>Pinus massoniana</i> , <i>Lithocarpus glaber</i> , <i>Choerospondias axillaris</i> , <i>Loropetalum chinense</i> |
| LGF         | 4           | 1800±648                               | 11.55±2.10       | 10.30±1.00    | 3500.22±1010.81               | <i>Quercus glauca</i> , <i>Lithocarpus glaber</i> , <i>Pinus massoniana</i> , <i>Symplocos setchuensis</i> Brand    |

**Table S2 Details on the 27 functional genes related to P cycling studied in this study.**

| <b>Pathway</b>                   | <b>Gene</b> | <b>Enzyme</b>                             | <b>KEGG ID</b> |
|----------------------------------|-------------|-------------------------------------------|----------------|
| Organic P mineralization         | phoA        | Alkaline phosphatase A                    | K01077         |
|                                  | phoD        | Alkaline phosphatase D                    | K01113         |
|                                  | phoX        | Alkaline phosphatase X                    | K07093         |
|                                  | phoN        | Acid phosphatase class A                  | K09474         |
|                                  | aphA        | Acid phosphatase class B                  | K03788         |
|                                  | olpA        | Acid phosphatase class C                  | K01078         |
|                                  | appA        | 4-phytase                                 | K01093         |
|                                  | 3-phytase   | 3-phytase                                 | K01083         |
|                                  | phnA        | C-P lyase multienzyme complex             | K19670         |
|                                  | phnW        | C-P lyase multienzyme complex             | K03430         |
|                                  | phnX        | C-P lyase multienzyme complex             | K05306         |
|                                  | phnG        | C-P lyase multienzyme complex             | K06166         |
|                                  | phnH        | C-P lyase multienzyme complex             | K06165         |
|                                  | phnI        | C-P lyase multienzyme complex             | K06164         |
|                                  | phnJ        | C-P lyase multienzyme complex             | K06163         |
|                                  | phnL        | C-P lyase multienzyme complex             | K05780         |
|                                  | phnM        | C-P lyase multienzyme complex             | K06162         |
|                                  | phnN        | C-P lyase multienzyme complex             | K05774         |
|                                  | phnP        | C-P lyase multienzyme complex             | K06167         |
| Inorganic P solubilization       | ppa         | Inorganic pyrophosphatase                 | K01507         |
|                                  | ppx         | Exopolyphosphatase                        | K01514         |
|                                  | ppk1        | Polyphosphate kinase                      | K00937         |
|                                  | gcd         | Quinoprotein glucose dehydrogenase        | K00117         |
|                                  | pqqC        | Pyrroloquinoline quinone synthase C       | K06137         |
| P-starvation response regulation | phoB        | Phosphate regulon response regulator      | K07657         |
|                                  | phoR        | Phosphate regulon sensor histidine kinase | K07636         |
|                                  | phoU        | PhoR/phoB inhibitor protein               | K02039         |

**Table S3 The abundance (RPKM) of species (phyla taxa) for a specific functional (KEGG gene) in organic and mineral soils.**

| Taxon                           | phoA | phoD  | phoX | phoN  | aphA | olpA | appA | 3-phytase | phnA  | phnW  | phnX  | phnG  | phnH  | phnI  | phnJ  | phnL  | phnM  | phnN  | phnP  | ppa   | ppx    | ppk1   | gcd    | pqqC   | phoB  | phoR   | phoU   |
|---------------------------------|------|-------|------|-------|------|------|------|-----------|-------|-------|-------|-------|-------|-------|-------|-------|-------|-------|-------|-------|--------|--------|--------|--------|-------|--------|--------|
| Average values of organic soils |      |       |      |       |      |      |      |           |       |       |       |       |       |       |       |       |       |       |       |       |        |        |        |        |       |        |        |
| Archaea                         |      |       |      |       |      |      |      |           |       |       |       |       |       |       |       |       |       |       |       |       |        |        |        |        |       |        |        |
| Thaumarchaeota                  | 0.00 | 0.00  | 0.00 | 0.00  | 0.00 | 0.00 | 0.00 | 0.00      | 0.00  | 0.00  | 0.00  | 0.00  | 0.00  | 0.00  | 0.00  | 0.00  | 0.00  | 0.00  | 0.00  | 1.66  | 2.73   | 0.00   | 0.00   | 1.20   | 0.00  | 0.83   | 2.43   |
| Candidatus_Thermoplasmatota     | 0.00 | 0.00  | 0.00 | 0.00  | 0.00 | 0.00 | 0.00 | 0.00      | 0.00  | 0.00  | 0.00  | 0.00  | 0.00  | 0.00  | 0.00  | 0.00  | 0.00  | 0.00  | 0.00  | 0.00  | 0.41   | 0.00   | 0.00   | 1.03   | 0.00  | 0.00   | 0.00   |
| Euryarchaeota                   | 0.00 | 0.00  | 0.00 | 0.00  | 0.00 | 0.00 | 0.00 | 0.00      | 0.00  | 0.00  | 0.00  | 0.00  | 0.00  | 0.00  | 0.00  | 0.16  | 0.00  | 0.00  | 0.00  | 0.00  | 0.00   | 0.11   | 0.00   | 0.00   | 0.00  | 0.00   | 0.43   |
| Candidatus_Bathyarchaeota       | 0.00 | 0.00  | 0.00 | 0.00  | 0.00 | 0.00 | 0.00 | 0.00      | 0.00  | 0.00  | 0.00  | 0.00  | 0.00  | 0.00  | 0.00  | 0.00  | 0.00  | 0.00  | 0.00  | 0.00  | 0.75   | 0.00   | 0.00   | 0.00   | 0.00  | 0.00   | 0.00   |
| Bacteria                        |      |       |      |       |      |      |      |           |       |       |       |       |       |       |       |       |       |       |       |       |        |        |        |        |       |        |        |
| Proteobacteria                  | 2.04 | 51.25 | 0.06 | 18.58 | 0.00 | 0.04 | 6.48 | 1.37      | 52.27 | 33.07 | 13.47 | 18.47 | 19.33 | 31.37 | 28.76 | 19.83 | 51.50 | 17.80 | 56.18 | 75.27 | 206.66 | 206.17 | 178.79 | 58.86  | 96.03 | 154.83 | 115.31 |
| Acidobacteria                   | 4.13 | 36.51 | 0.00 | 3.04  | 0.00 | 1.03 | 7.28 | 0.00      | 15.95 | 7.75  | 30.78 | 0.00  | 0.00  | 0.00  | 0.00  | 0.00  | 0.18  | 0.00  | 74.00 | 74.65 | 145.97 | 176.01 | 468.22 | 103.11 | 28.31 | 204.28 | 149.16 |
| Actinobacteria                  | 0.00 | 0.16  | 0.00 | 0.00  | 0.00 | 0.67 | 0.00 | 0.00      | 7.93  | 0.24  | 0.00  | 2.24  | 1.11  | 4.44  | 1.61  | 3.48  | 7.33  | 0.70  | 0.20  | 63.30 | 117.18 | 137.20 | 1.80   | 8.99   | 10.06 | 29.92  | 56.46  |
| Verrucomicrobia                 | 0.00 | 0.22  | 0.00 | 2.17  | 0.09 | 0.00 | 0.03 | 0.08      | 0.36  | 0.00  | 0.00  | 0.00  | 0.00  | 0.00  | 0.00  | 0.19  | 0.22  | 0.00  | 5.35  | 2.04  | 2.91   | 21.46  | 8.77   | 3.05   | 9.64  | 10.27  | 22.74  |
| Chloroflexi                     | 0.00 | 0.00  | 0.00 | 0.00  | 0.00 | 0.00 | 0.00 | 0.04      | 0.57  | 0.20  | 0.11  | 0.00  | 0.00  | 0.66  | 0.55  | 0.15  | 0.55  | 0.00  | 1.93  | 0.55  | 6.48   | 17.73  | 1.06   | 0.76   | 2.17  | 23.00  | 9.53   |
| Bacteroidetes                   | 0.00 | 0.00  | 0.00 | 0.00  | 0.00 | 0.00 | 0.00 | 0.00      | 3.12  | 0.00  | 0.00  | 0.00  | 1.15  | 0.91  | 0.45  | 0.60  | 1.17  | 0.15  | 0.80  | 1.62  | 0.57   | 1.53   | 3.49   | 0.00   | 0.76  | 2.92   | 1.79   |
| Gemmatimonadetes                | 0.00 | 0.91  | 0.00 | 0.00  | 0.00 | 0.00 | 0.00 | 0.00      | 0.44  | 0.18  | 0.42  | 0.00  | 0.00  | 0.00  | 0.00  | 0.00  | 0.00  | 0.00  | 1.99  | 1.24  | 3.59   | 8.33   | 11.27  | 0.92   | 2.78  | 3.58   | 2.87   |
| Planctomycetes                  | 1.10 | 0.22  | 0.00 | 0.00  | 0.00 | 0.00 | 0.00 | 0.00      | 0.00  | 0.00  | 0.57  | 0.00  | 0.00  | 0.00  | 0.00  | 0.00  | 0.00  | 0.00  | 0.87  | 2.91  | 0.92   | 11.69  | 5.22   | 0.77   | 2.80  | 4.21   | 1.85   |
| Candidatus_Eremiobacteraeota    | 0.00 | 0.00  | 0.00 | 0.15  | 0.00 | 0.00 | 0.82 | 0.00      | 0.00  | 0.00  | 0.12  | 0.00  | 0.09  | 0.57  | 0.00  | 0.29  | 0.21  | 0.00  | 0.00  | 1.34  | 2.54   | 2.83   | 0.00   | 1.10   | 0.08  | 1.24   | 1.51   |
| fungi                           |      |       |      |       |      |      |      |           |       |       |       |       |       |       |       |       |       |       |       |       |        |        |        |        |       |        |        |
| Ascomycota                      | 0.06 | 0.18  | 0.00 | 0.00  | 0.00 | 0.00 | 0.00 | 0.00      | 0.00  | 0.00  | 0.00  | 0.00  | 0.00  | 0.00  | 0.00  | 0.00  | 0.00  | 0.00  | 0.00  | 0.00  | 0.00   | 0.00   | 0.00   | 0.00   | 0.00  | 0.00   | 0.00   |
| Basidiomycota                   | 0.00 | 0.28  | 0.00 | 0.00  | 0.00 | 0.00 | 0.00 | 0.00      | 0.00  | 0.00  | 0.00  | 0.00  | 0.00  | 0.00  | 0.00  | 0.00  | 0.00  | 0.00  | 0.00  | 0.00  | 0.00   | 0.00   | 0.00   | 0.00   | 0.00  | 0.00   | 0.00   |
| Average values of mineral soils |      |       |      |       |      |      |      |           |       |       |       |       |       |       |       |       |       |       |       |       |        |        |        |        |       |        |        |
| Archaea                         |      |       |      |       |      |      |      |           |       |       |       |       |       |       |       |       |       |       |       |       |        |        |        |        |       |        |        |
| Thaumarchaeota                  | 0.00 | 0.00  | 0.00 | 0.00  | 0.00 | 0.00 | 0.00 | 0.00      | 0.00  | 0.00  | 0.00  | 0.00  | 0.00  | 0.00  | 0.00  | 0.00  | 0.00  | 0.00  | 0.00  | 1.05  | 1.37   | 0.00   | 0.00   | 0.54   | 0.00  | 0.19   | 1.37   |
| Candidatus_Thermoplasmatota     | 0.00 | 0.00  | 0.00 | 0.00  | 0.00 | 0.00 | 0.00 | 0.00      | 0.00  | 0.00  | 0.00  | 0.00  | 0.00  | 0.00  | 0.00  | 0.00  | 0.00  | 0.00  | 0.00  | 0.00  | 0.00   | 0.00   | 0.00   | 0.07   | 0.00  | 0.00   | 0.00   |
| Euryarchaeota                   | 0.00 | 0.00  | 0.00 | 0.00  | 0.00 | 0.00 | 0.00 | 0.00      | 0.00  | 0.00  | 0.00  | 0.00  | 0.00  | 0.00  | 0.00  | 0.16  | 0.00  | 0.00  | 0.00  | 0.00  | 0.00   | 0.12   | 0.00   | 0.00   | 0.00  | 0.00   | 0.04   |
| Candidatus_Bathyarchaeota       | 0.00 | 0.00  | 0.00 | 0.00  | 0.00 | 0.00 | 0.00 | 0.00      | 0.00  | 0.00  | 0.00  | 0.00  | 0.00  | 0.00  | 0.00  | 0.00  | 0.00  | 0.00  | 0.00  | 0.00  | 0.13   | 0.00   | 0.00   | 0.00   | 0.00  | 0.00   | 0.00   |

|                              |      |       |      |       |      |      |       |      |       |       |       |       |       |       |       |       |       |       |       |        |        |        |        |       |        |        |        |
|------------------------------|------|-------|------|-------|------|------|-------|------|-------|-------|-------|-------|-------|-------|-------|-------|-------|-------|-------|--------|--------|--------|--------|-------|--------|--------|--------|
| <b>Bacteria</b>              |      |       |      |       |      |      |       |      |       |       |       |       |       |       |       |       |       |       |       |        |        |        |        |       |        |        |        |
| Proteobacteria               | 2.32 | 63.32 | 0.26 | 21.40 | 0.49 | 0.11 | 7.59  | 2.28 | 46.79 | 35.72 | 20.44 | 19.45 | 22.23 | 35.81 | 30.45 | 20.93 | 59.63 | 22.91 | 65.12 | 95.27  | 230.80 | 237.61 | 207.48 | 48.27 | 104.03 | 159.27 | 137.78 |
| Acidobacteria                | 3.51 | 35.62 | 0.00 | 5.74  | 0.00 | 0.66 | 16.04 | 0.00 | 6.75  | 3.88  | 15.27 | 0.00  | 0.00  | 0.38  | 0.00  | 0.00  | 0.00  | 0.00  | 57.09 | 82.04  | 105.96 | 143.66 | 346.03 | 71.58 | 16.14  | 133.20 | 117.32 |
| Actinobacteria               | 0.00 | 0.10  | 0.00 | 0.00  | 0.00 | 1.06 | 0.00  | 0.00 | 14.97 | 0.08  | 0.00  | 5.92  | 5.51  | 9.68  | 4.91  | 8.01  | 19.63 | 1.78  | 0.16  | 106.25 | 210.74 | 216.67 | 2.56   | 17.29 | 17.31  | 47.81  | 101.65 |
| Verrucomicrobia              | 0.12 | 0.00  | 0.00 | 2.52  | 0.00 | 0.00 | 0.91  | 0.12 | 0.00  | 0.00  | 0.00  | 0.00  | 0.00  | 0.00  | 0.00  | 0.52  | 0.76  | 0.00  | 3.62  | 2.18   | 4.15   | 7.86   | 10.45  | 1.21  | 4.62   | 7.77   | 9.53   |
| Chloroflexi                  | 0.00 | 0.00  | 0.00 | 0.00  | 0.00 | 0.00 | 0.00  | 0.00 | 0.06  | 0.15  | 0.22  | 0.16  | 0.00  | 0.13  | 0.12  | 0.05  | 0.16  | 0.00  | 0.03  | 0.41   | 1.74   | 5.00   | 0.69   | 0.19  | 0.81   | 4.33   | 1.71   |
| Bacteroidetes                | 0.00 | 0.00  | 0.00 | 0.00  | 0.00 | 0.00 | 0.00  | 0.00 | 1.69  | 0.00  | 0.09  | 0.00  | 1.76  | 2.36  | 2.03  | 1.62  | 5.92  | 1.11  | 2.09  | 4.10   | 4.55   | 4.46   | 11.28  | 0.00  | 1.47   | 9.81   | 3.25   |
| Gemmatimonadetes             | 0.00 | 1.01  | 0.00 | 0.00  | 0.00 | 0.00 | 0.00  | 0.00 | 0.00  | 0.00  | 0.00  | 0.00  | 0.00  | 0.00  | 0.00  | 0.00  | 0.00  | 0.00  | 4.23  | 1.05   | 3.03   | 7.66   | 8.05   | 0.56  | 3.13   | 6.10   | 2.74   |
| Planctomycetes               | 0.09 | 0.11  | 0.00 | 0.00  | 0.00 | 0.00 | 0.00  | 0.00 | 0.00  | 0.00  | 0.55  | 0.00  | 0.00  | 0.00  | 0.00  | 0.00  | 0.00  | 0.00  | 0.66  | 1.09   | 0.85   | 6.39   | 4.31   | 0.26  | 1.43   | 2.86   | 1.50   |
| Candidatus_Eremiobacteraeota | 0.00 | 0.00  | 0.00 | 0.79  | 0.00 | 0.00 | 1.65  | 0.00 | 0.00  | 0.00  | 0.07  | 0.00  | 0.23  | 0.63  | 0.00  | 0.36  | 0.12  | 0.00  | 0.00  | 2.62   | 5.82   | 6.81   | 0.00   | 2.06  | 0.00   | 3.22   | 3.85   |
| <b>Fungi</b>                 |      |       |      |       |      |      |       |      |       |       |       |       |       |       |       |       |       |       |       |        |        |        |        |       |        |        |        |
| Ascomycota                   | 0.00 | 0.11  | 0.00 | 0.00  | 0.00 | 0.00 | 0.00  | 0.00 | 0.00  | 0.00  | 0.00  | 0.00  | 0.00  | 0.00  | 0.00  | 0.00  | 0.00  | 0.00  | 0.00  | 0.34   | 0.00   | 0.00   | 0.00   | 0.00  | 0.00   | 0.00   | 0.00   |
| Basidiomycota                | 0.00 | 0.22  | 0.00 | 0.00  | 0.00 | 0.00 | 0.00  | 0.00 | 0.00  | 0.00  | 0.00  | 0.00  | 0.00  | 0.00  | 0.00  | 0.00  | 0.00  | 0.00  | 0.00  | 0.00   | 0.00   | 0.00   | 0.00   | 0.00  | 0.00   | 0.00   | 0.00   |

Average values of organic and mineral soils

|                             |      |       |      |       |      |      |       |      |       |       |       |       |       |       |       |       |       |       |       |       |        |        |        |       |        |        |        |
|-----------------------------|------|-------|------|-------|------|------|-------|------|-------|-------|-------|-------|-------|-------|-------|-------|-------|-------|-------|-------|--------|--------|--------|-------|--------|--------|--------|
| <b>Archaea</b>              |      |       |      |       |      |      |       |      |       |       |       |       |       |       |       |       |       |       |       |       |        |        |        |       |        |        |        |
| Thaumarchaeota              | 0.00 | 0.00  | 0.00 | 0.00  | 0.00 | 0.00 | 0.00  | 0.00 | 0.00  | 0.00  | 0.00  | 0.00  | 0.00  | 0.00  | 0.00  | 0.00  | 0.00  | 0.00  | 0.00  | 1.35  | 2.05   | 0.00   | 0.00   | 0.87  | 0.00   | 0.51   | 1.90   |
| Candidatus_Thermoplasmatota | 0.00 | 0.00  | 0.00 | 0.00  | 0.00 | 0.00 | 0.00  | 0.00 | 0.00  | 0.00  | 0.00  | 0.00  | 0.00  | 0.00  | 0.00  | 0.00  | 0.00  | 0.00  | 0.00  | 0.00  | 0.21   | 0.00   | 0.00   | 0.55  | 0.00   | 0.00   | 0.00   |
| Euryarchaeota               | 0.00 | 0.00  | 0.00 | 0.00  | 0.00 | 0.00 | 0.00  | 0.00 | 0.00  | 0.00  | 0.00  | 0.00  | 0.00  | 0.00  | 0.00  | 0.16  | 0.00  | 0.00  | 0.00  | 0.00  | 0.00   | 0.11   | 0.00   | 0.00  | 0.00   | 0.00   | 0.24   |
| Candidatus_Bathyarchaeota   | 0.00 | 0.00  | 0.00 | 0.00  | 0.00 | 0.00 | 0.00  | 0.00 | 0.00  | 0.00  | 0.00  | 0.00  | 0.00  | 0.00  | 0.00  | 0.00  | 0.00  | 0.00  | 0.00  | 0.00  | 0.44   | 0.00   | 0.00   | 0.00  | 0.00   | 0.00   | 0.00   |
| <b>Bacterial</b>            |      |       |      |       |      |      |       |      |       |       |       |       |       |       |       |       |       |       |       |       |        |        |        |       |        |        |        |
| Proteobacteria              | 2.18 | 57.28 | 0.16 | 19.99 | 0.24 | 0.08 | 7.04  | 1.82 | 49.53 | 34.40 | 16.95 | 18.96 | 20.78 | 33.59 | 29.61 | 20.38 | 55.56 | 20.35 | 60.65 | 85.27 | 218.73 | 221.89 | 193.14 | 53.57 | 100.03 | 157.05 | 126.55 |
| Acidobacteria               | 3.82 | 36.06 | 0.00 | 4.39  | 0.00 | 0.84 | 11.66 | 0.00 | 11.35 | 5.82  | 23.03 | 0.00  | 0.00  | 0.19  | 0.00  | 0.00  | 0.09  | 0.00  | 65.54 | 78.35 | 125.97 | 159.84 | 407.13 | 87.34 | 22.22  | 168.74 | 133.24 |
| Actinobacteria              | 0.00 | 0.13  | 0.00 | 0.00  | 0.00 | 0.87 | 0.00  | 0.00 | 11.45 | 0.16  | 0.00  | 4.08  | 3.31  | 7.06  | 3.26  | 5.74  | 13.48 | 1.24  | 0.18  | 84.77 | 163.96 | 176.93 | 2.18   | 13.14 | 13.68  | 38.86  | 79.06  |
| Verrucomicrobia             | 0.06 | 0.11  | 0.00 | 2.34  | 0.05 | 0.00 | 0.47  | 0.10 | 0.18  | 0.00  | 0.00  | 0.00  | 0.00  | 0.00  | 0.00  | 0.35  | 0.49  | 0.00  | 4.49  | 2.11  | 3.53   | 14.66  | 9.61   | 2.13  | 7.13   | 9.02   | 16.13  |
| Chloroflexi                 | 0.00 | 0.00  | 0.00 | 0.00  | 0.00 | 0.00 | 0.00  | 0.02 | 0.32  | 0.18  | 0.16  | 0.08  | 0.00  | 0.40  | 0.34  | 0.10  | 0.36  | 0.00  | 0.98  | 0.48  | 4.11   | 11.37  | 0.87   | 0.47  | 1.49   | 13.66  | 5.62   |
| Bacteroidetes               | 0.00 | 0.00  | 0.00 | 0.00  | 0.00 | 0.00 | 0.00  | 0.00 | 2.41  | 0.00  | 0.05  | 0.00  | 1.45  | 1.64  | 1.24  | 1.11  | 3.54  | 0.63  | 1.45  | 2.86  | 2.56   | 3.00   | 7.39   | 0.00  | 1.11   | 6.36   | 2.52   |
| Gemmatimonadetes            | 0.00 | 0.96  | 0.00 | 0.00  | 0.00 | 0.00 | 0.00  | 0.00 | 0.22  | 0.09  | 0.21  | 0.00  | 0.00  | 0.00  | 0.00  | 0.00  | 0.00  | 0.00  | 3.11  | 1.15  | 3.31   | 8.00   | 9.66   | 0.74  | 2.96   | 4.84   | 2.80   |
| Planctomycetes              | 0.59 | 0.16  | 0.00 | 0.00  | 0.00 | 0.00 | 0.00  | 0.00 | 0.00  | 0.00  | 0.56  | 0.00  | 0.00  | 0.00  | 0.00  | 0.00  | 0.00  | 0.00  | 0.77  | 2.00  | 0.88   | 9.04   | 4.76   | 0.51  | 2.12   | 3.54   | 1.68   |

[illegible]

**Table S4 Pearson correlations between the available soil P concentration and the relative abundance of the P cycling genes selected by Random Forest analysis.**

| <b>Gene</b>      | <b><i>df</i></b> | <b><i>r</i></b> | <b><i>P</i> value</b> |
|------------------|------------------|-----------------|-----------------------|
| pqqC             | 14               | -0.681          | 0.004                 |
| phoR             | 14               | -0.691          | 0.003                 |
| <b>appA</b>      | <b>14</b>        | <b>0.732</b>    | <b>0.001</b>          |
| phnP             | 14               | -0.737          | 0.001                 |
| <b>3-phytase</b> | <b>14</b>        | <b>0.672</b>    | <b>0.004</b>          |
| gcd              | 14               | -0.582          | 0.018                 |
| <b>ppa</b>       | <b>14</b>        | <b>0.707</b>    | <b>0.002</b>          |

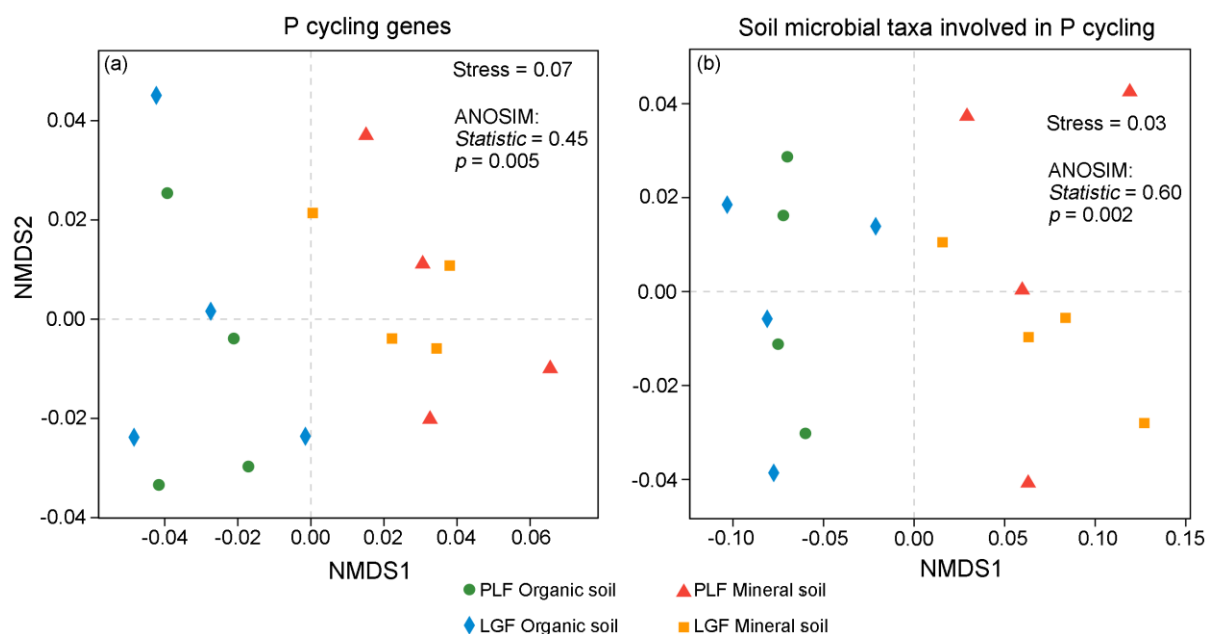

**Figure S1 Nonmetric multidimensional scaling plots (NMDS) of P cycling genes (a) and soil microbial taxa involved in P cycling (b) in soils.** NMDS had a good explanation of variation as stress < 0.1. ANOSIM showed significant differences in variables between organic and mineral soil as  $p < 0.05$ .
